# Supplementary material for: Short-Term Outcomes after D2 Gastrectomy with Complete Mesogastric Excision in Patients with Locally Advanced Gastric Cancer: A Systematic Review and Meta-Analysis of High-Quality Studies
Source: MDPI journal article supplement (doi:10.3390/cancers16010199), 2023-12-31

***Short-Term Outcomes after D2 Gastrectomy with Complete Mesogastric  
Excision in Patients with Locally Advanced Gastric Cancer: A Systematic  
Review and Meta-Analysis of High-Quality Studies***

SUPPLEMENTARY MATERIALS

Index

|                                                                         |   |
|-------------------------------------------------------------------------|---|
| 1) Search queries                                                       | 2 |
| 2) Funnel plots of subgroup analysis and bubble plots of metaregression | 3 |
| 3) Risk of bias assessment: traffic light plot                          | 5 |
| 4) Secondary endpoints: Funnel plots of publication bias                | 7 |

## 1) Search queries

### **Pubmed and Cochrane Library = 90 results**

*((gastric cancer) OR (gastric neopl\*) OR (gastric adenocarcinoma) OR (cancer of the stomach) OR (adenocarcinoma of the stomach) OR (gastric tumor)) AND ((complete mesogastr\* excision) OR (mesogastr\*) OR (CME) OR (enjoyable space) OR (holy plane))*

### **Scopus = 663 results**

*("gastric cancer" OR "gastric neopl\*" OR "gastric adenocarcinoma" OR "cancer of the stomach" OR "adenocarcinoma of the stomach" OR "gastric tumor") AND ("complete mesogastr\* excision" OR "mesogastr\*" OR "CME" OR "enjoyable space" OR "holy plane")*

## 2) Funnel plots of subgroup analysis and bubble plots of metaregression

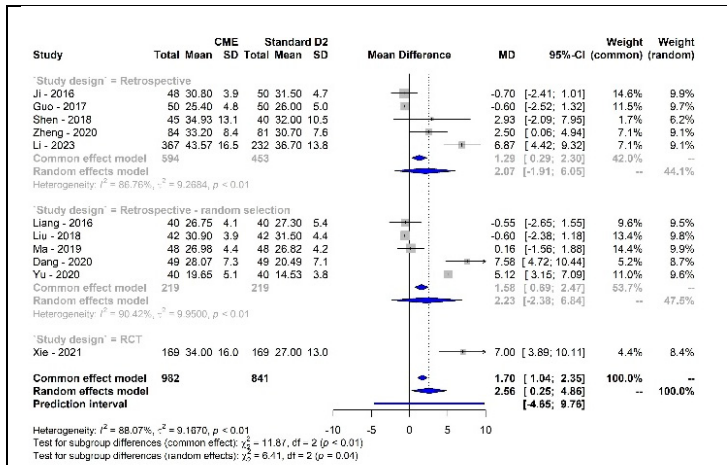

Subgroup analysis: study design

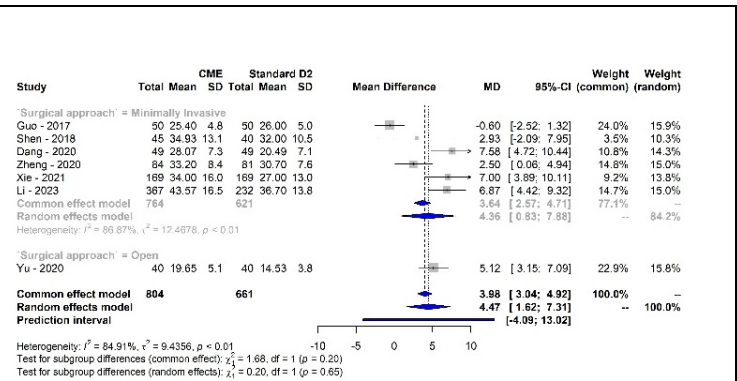

Subgroup analysis: surgical approach

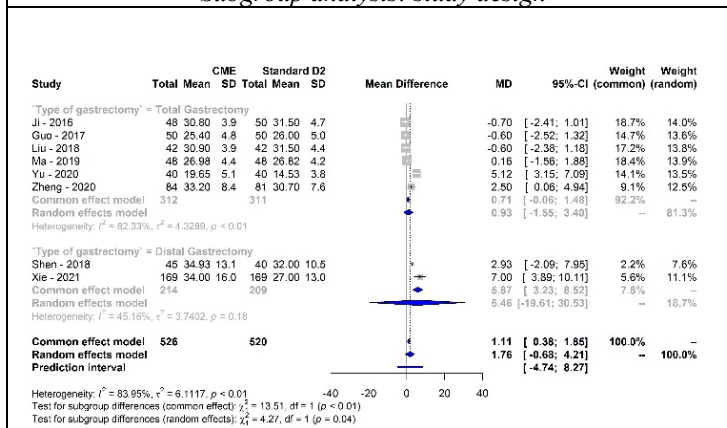

Subgroup analysis: type of gastrectomy

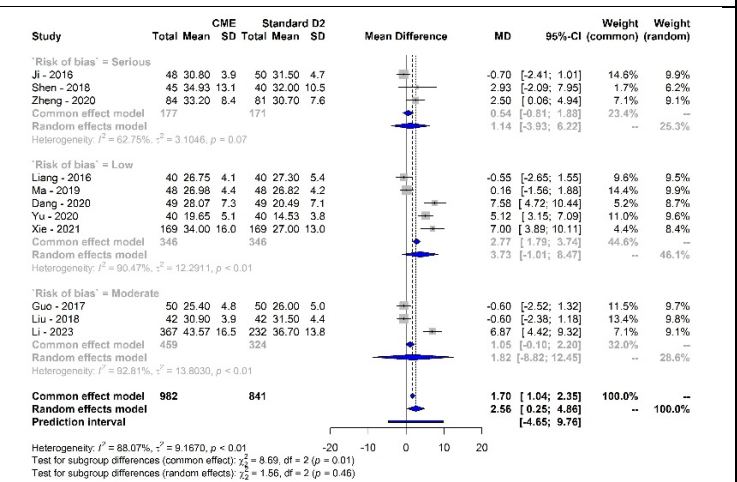

Subgroup analysis: risk of bias

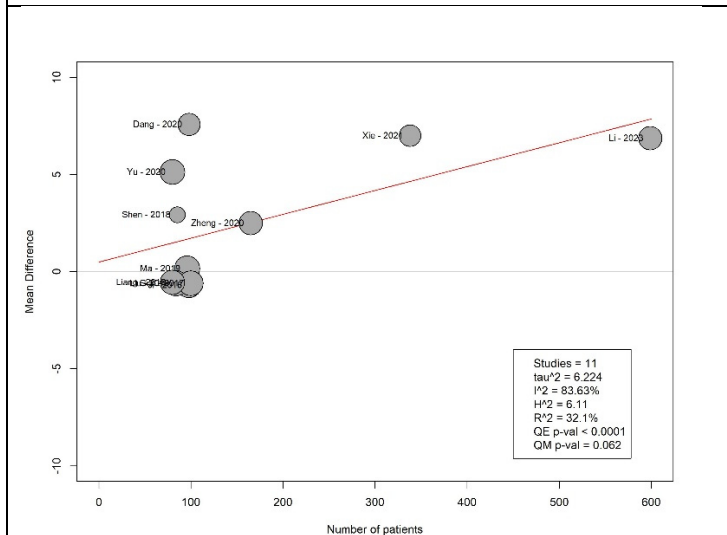

Metaregression analysis: number of patients per study

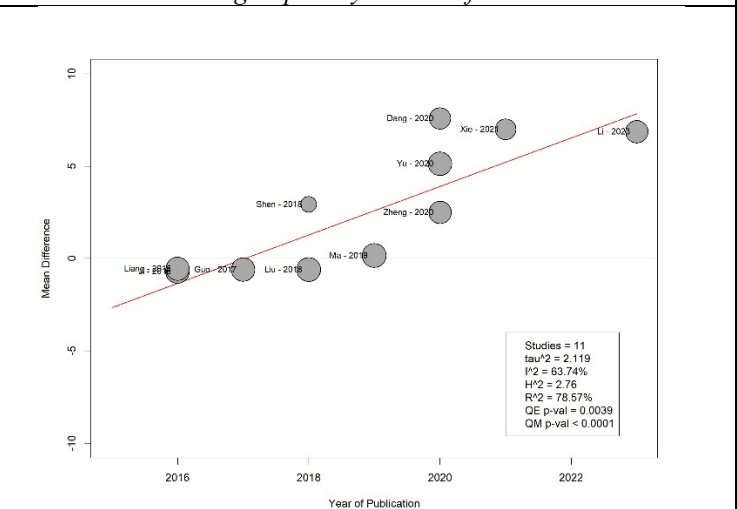

Metaregression analysis: year of publication

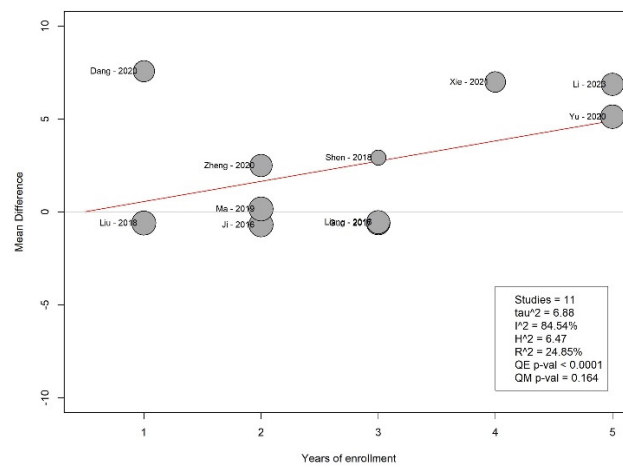

*Metaregression analysis: years of enrollment*

### 3) Risk of bias assessment: traffic light plot

|                                                         |             | Risk of bias domains |    |    |    |    |    |    |           |
|---------------------------------------------------------|-------------|----------------------|----|----|----|----|----|----|-----------|
|                                                         |             | D1                   | D2 | D3 | D4 | D5 | D6 | D7 | Overall   |
| Study                                                   | Ji F 2016   |                      |    |    |    |    |    |    |           |
|                                                         | Liu A 2018  |                      |    |    |    |    |    |    |           |
|                                                         | Luo XZ 2018 |                      |    |    |    |    |    |    |           |
|                                                         | Li 2023     |                      |    |    |    |    |    |    |           |
|                                                         | Shen 2018   |                      |    |    |    |    |    |    |           |
|                                                         | Zheng 2020  |                      |    |    |    |    |    |    |           |
| Domains:                                                |             |                      |    |    |    |    |    |    | Judgement |
| D1: Bias due to confounding.                            |             |                      |    |    |    |    |    |    | Low       |
| D2: Bias due to selection of participants.              |             |                      |    |    |    |    |    |    | Serious   |
| D3: Bias in classification of interventions.            |             |                      |    |    |    |    |    |    | Moderate  |
| D4: Bias due to deviations from intended interventions. |             |                      |    |    |    |    |    |    |           |
| D5: Bias due to missing data.                           |             |                      |    |    |    |    |    |    |           |
| D6: Bias in measurement of outcomes.                    |             |                      |    |    |    |    |    |    |           |
| D7: Bias in selection of the reported result.           |             |                      |    |    |    |    |    |    |           |

*Risk of bias assessment for non-randomized studies - traffic light plot*

|       |              | Risk of bias domains                                                                |                                                                                     |                                                                                     |                                                                                     |                                                                                       |                                                                                       |
|-------|--------------|-------------------------------------------------------------------------------------|-------------------------------------------------------------------------------------|-------------------------------------------------------------------------------------|-------------------------------------------------------------------------------------|---------------------------------------------------------------------------------------|---------------------------------------------------------------------------------------|
|       |              | D1                                                                                  | D2                                                                                  | D3                                                                                  | D4                                                                                  | D5                                                                                    | Overall                                                                               |
| Study | Li B 2015    |    |    |    |    |    |    |
|       | Liang Y 2016 |    |    |    |    |    |    |
|       | Guo YF 2017  |    |    |    |    |    |    |
|       | Ma W 2019    |    |    |    |    |    |    |
|       | Dang PY 2020 |  |  |  |  |  |  |
|       | Yu DS 2020   |  |  |  |  |  |  |
|       | Xie 2021     |  |  |  |  |  |  |

Domains:  
D1: Bias due to randomisation.  
D2: Bias due to deviations from intended intervention.  
D3: Bias due to missing data.  
D4: Bias due to outcome measurement.  
D5: Bias due to selection of reported result.

Judgement  
 Low  
 Some concerns

*Risk of bias assessment for randomized studies - traffic light plot*

#### 4) Secondary endpoints: Funnel plots of publication bias

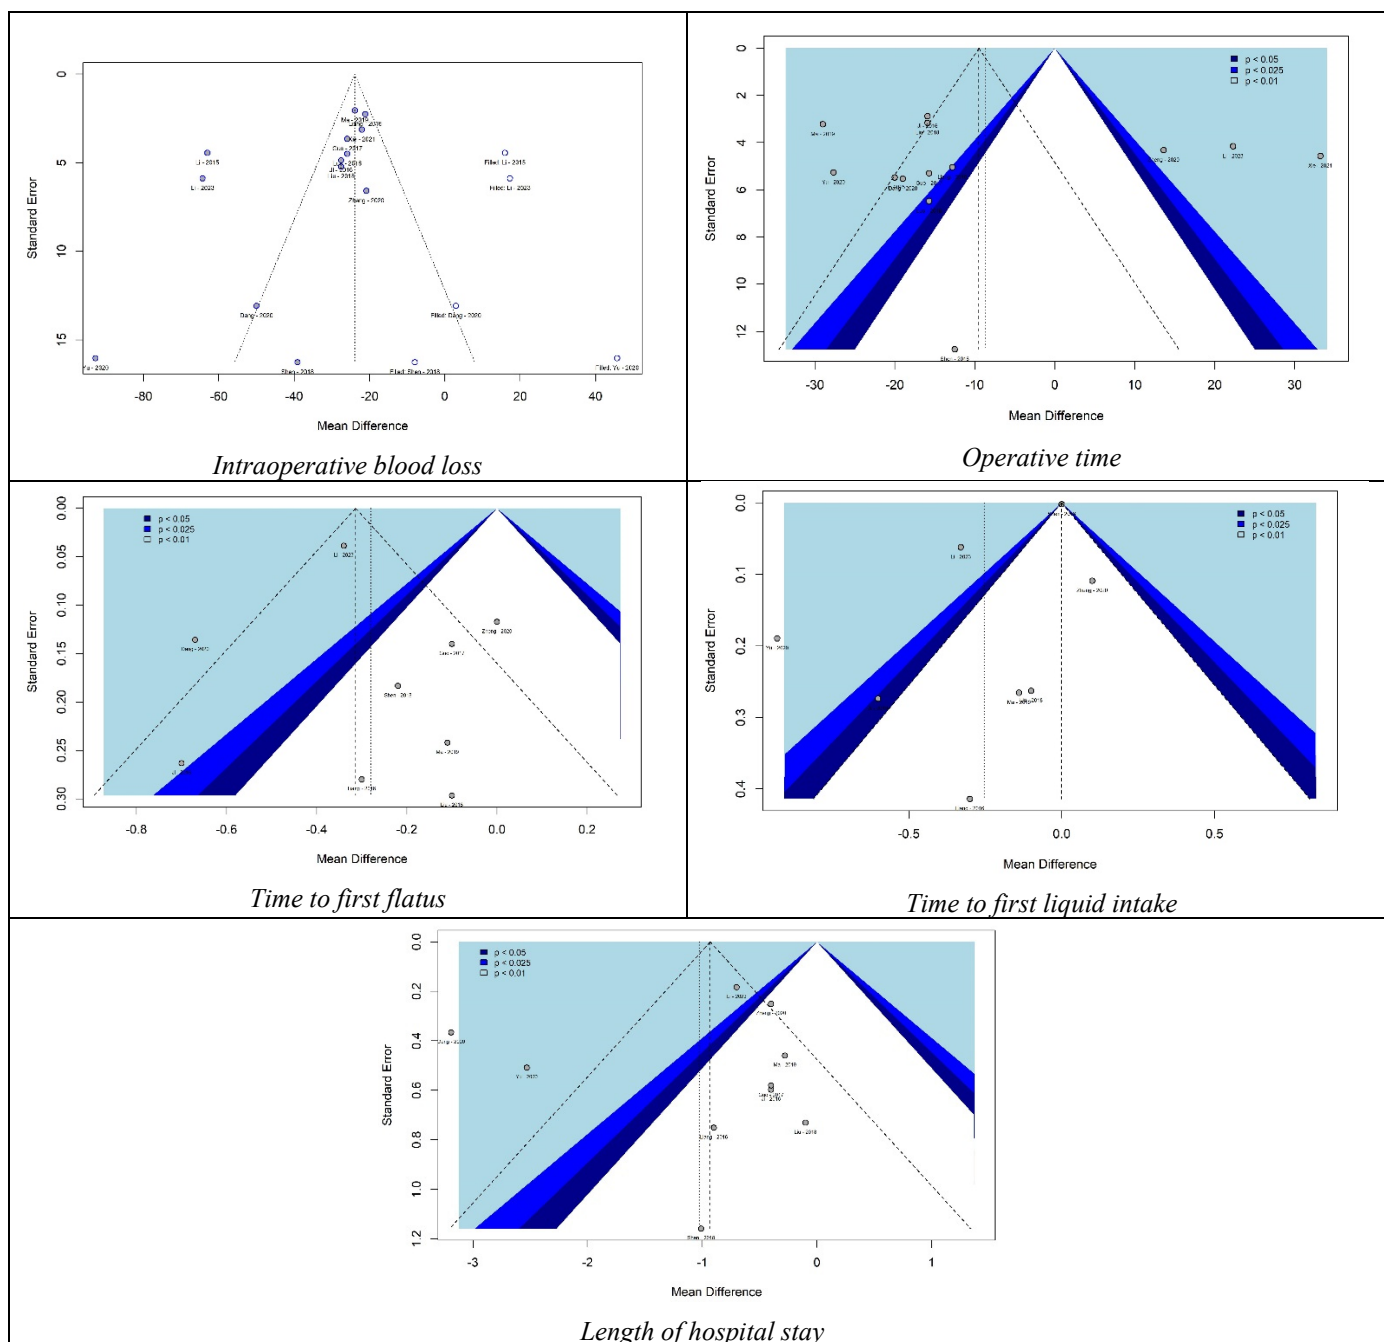

Supplement: s1 [file Supplementary materials.pdf › Supplementary materials.pdf]
